# Supplementary material for: Development of Highly Sensitive Temperature Microsensors for Localized Measurements
Source: MDPI journal article supplement (doi:10.3390/app11093864), 2021-04-24
Supplement: s1 [file s1]

Archive with 1 entries (1 files):
- applsci-1138429-supplementary.pdf
