# Supplementary material for: Development of Highly Sensitive Temperature Microsensors for Localized Measurements
Source: MDPI journal article supplement (doi:10.3390/app11093864), 2021-04-24
Supplement: s1 [file s1 › applsci-1138429-supplementary.pdf]

# Development of highly sensitive temperature microsensors for localized measurements

Paulo Sousa,<sup>1\*</sup> Vânia Pinto,<sup>1</sup> Vitor Magalhães,<sup>1</sup> Raquel Rodrigues,<sup>1</sup> Patrícia Sousa<sup>2</sup> and Graça Minas<sup>1\*</sup>

*1 Microelectromechanical Systems Research Unit (CMEMS-UMinho), University of Minho, Campus de Azurém, 4800-058 Guimarães, Portugal*

*2 INL International Iberian Nanotechnology Laboratory, Braga, Portugal*

\*Correspondence: psousa@dei.uminho.pt, gminas@dei.uminho.pt

## Supplementary Information

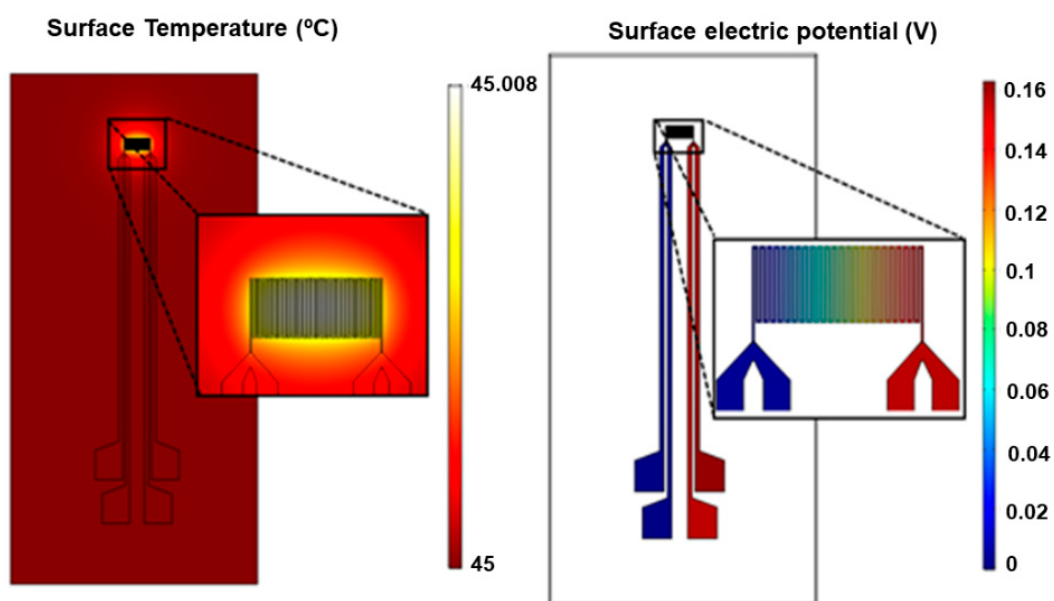

**Figure S1.** Simulated temperature and electric potential distribution for a sensor with 24 windings, with an excitation current of 100  $\mu$ A and temperature of 45 °C.

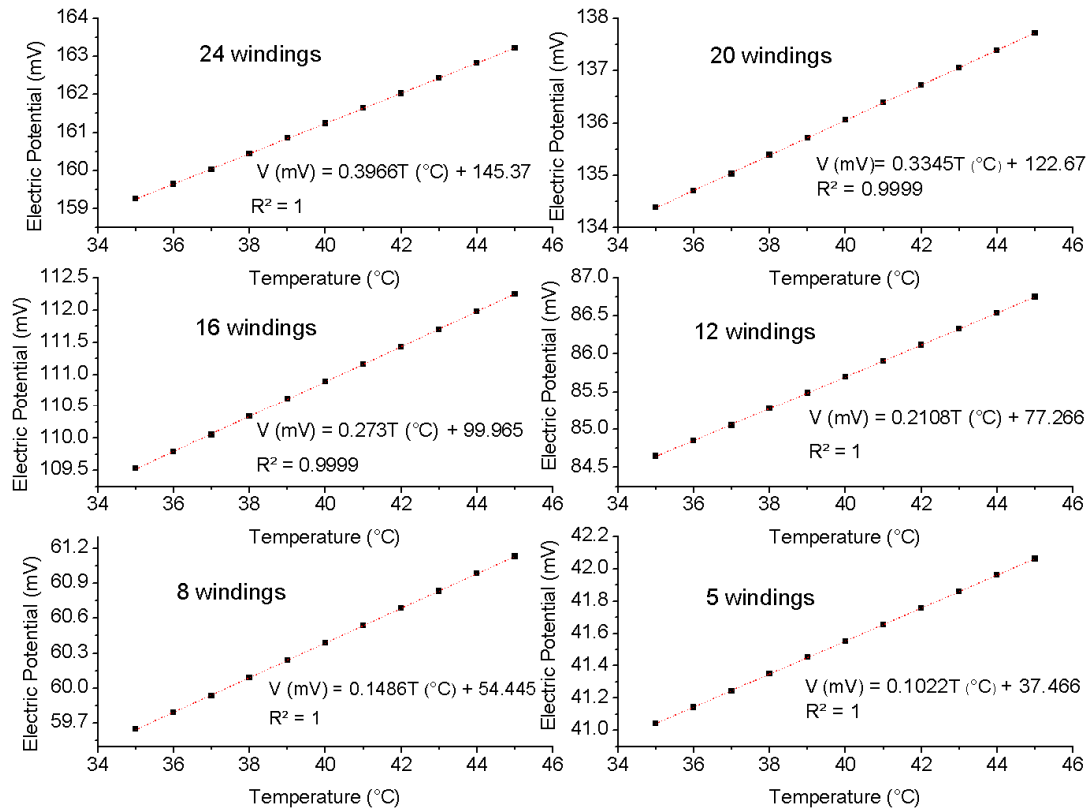

**Figure S2.** Simulated temperature and electric potential distribution for a sensor with 24 windings, with an excitation current of 100  $\mu\text{A}$  and temperature of 45  $^{\circ}\text{C}$ .

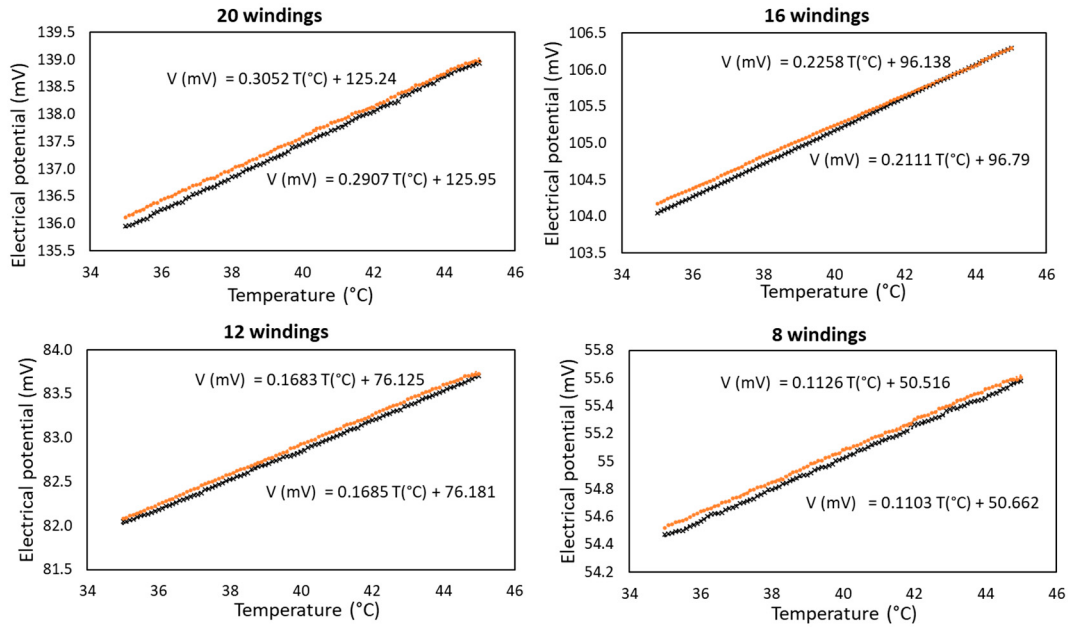

**Figure S3.** Experimental sensitivity of the sensors for the different fabricated RTDs according to the winding number. Orange line represents an increase temperature from 35 to 45  $^{\circ}\text{C}$ , and black line a decrease temperature from 45 to 35  $^{\circ}\text{C}$ .
